# Supplementary material for: Cooking Coal Use and All-Cause and Cause-Specific Mortality in a Prospective Cohort Study of Women in Shanghai, China
Source: PubMed Central journal article supplement (PMC5010399; doi:10.1289/ehp236), 2016-04-19
Supplement: EHP236.s001.acco.pdf [file EHP236.s001.acco.pdf]

**Note to readers with disabilities:** *EHP* strives to ensure that all journal content is accessible to all readers. However, some figures and Supplemental Material published in *EHP* articles may not conform to [508 standards](#) due to the complexity of the information being presented. If you need assistance accessing journal content, please contact [ehp508@niehs.nih.gov](mailto:ehp508@niehs.nih.gov). Our staff will work with you to assess and meet your accessibility needs within 3 working days.

## **Supplemental Material**

### **Cooking Coal Use and All-Cause and Cause-Specific Mortality in a Prospective Cohort Study of Women in Shanghai, China**

Christopher Kim, Wei Jie Seow, Xiao-Ou Shu, Bryan A. Bassig, Nathaniel Rothman, Bingshu Chen, Yong-Bing Xiang, H. Dean Hosgood III, Bu-Tian Ji, Wei Hu, Cuiju Wen, Wong-Ho Chow, Qiuyin Cai, Gong Yang, Yu-Tang Gao, Wei Zheng, and Qing Lan

#### **Table of Contents**

**Table S1.** Risk of all-cause and cause-specific mortality by ever usage of coal in Shanghai Women's Health Study, stratified by family annual income

**Table S2.** Risk of all-cause and cause-specific mortality by ever usage of coal in Shanghai Women's Health Study, stratified by education

**Table S3.** Risk of all-cause and cause-specific mortality by ever usage of coal in Shanghai Women's Health Study, stratified by kitchen ventilation

**Table S1. Risk of all-cause and cause-specific mortality by ever usage of coal in Shanghai Women's Health Study, stratified by family annual income**

| Cause of death (ICD-9)           | Never used coal<br>HR(95% CI) <sup>a</sup> | ≥20,000 yuan                          |                         | <20,000 yuan                          |                         | Interaction <i>P</i> |
|----------------------------------|--------------------------------------------|---------------------------------------|-------------------------|---------------------------------------|-------------------------|----------------------|
|                                  |                                            | Ever used coal<br>Deaths <sup>b</sup> | HR(95% CI) <sup>a</sup> | Ever used coal<br>Deaths <sup>b</sup> | HR(95% CI) <sup>a</sup> |                      |
| All cause                        | 1.00 (ref)                                 | 727                                   | 1.17 (1.04, 1.32)       | 1772                                  | 1.10 (1.01, 1.20)       | 0.46                 |
| Cancer (140-208)                 | 1.00 (ref)                                 | 345                                   | 1.12 (0.95, 1.32)       | 699                                   | 1.17 (1.01, 1.34)       | 0.70                 |
| Lung cancer (162)                | 1.00 (ref)                                 | 73                                    | 1.18 (0.81, 1.70)       | 141                                   | 1.20 (0.88, 1.63)       | 0.52                 |
| Cardiovascular (390-459)         | 1.00 (ref)                                 | 153                                   | 1.40 (1.07, 1.85)       | 430                                   | 1.10 (0.92, 1.32)       | 0.19                 |
| Ischemic heart disease (410-414) | 1.00 (ref)                                 | 42                                    | 2.31 (1.25, 4.29)       | 91                                    | 1.33 (0.88, 2.03)       | 0.24                 |
| Myocardial infarction (410)      | 1.00 (ref)                                 | 31                                    | 3.79 (1.67, 8.60)       | 60                                    | 1.25 (0.74, 2.10)       | 0.08                 |
| Stroke (430-438)                 | 1.00 (ref)                                 | 88                                    | 1.24 (0.87, 1.77)       | 261                                   | 0.94 (0.75, 1.17)       | 0.19                 |
| Ischemic stroke (434)            | 1.00 (ref)                                 | 34                                    | 1.05 (0.60, 1.84)       | 111                                   | 1.11 (0.78, 1.57)       | 0.88                 |
| Hemorrhagic stroke (430-432)     | 1.00 (ref)                                 | 46                                    | 1.31 (0.81, 2.14)       | 119                                   | 0.77 (0.56, 1.06)       | 0.12                 |
| Gastrointestinal (520-579)       | 1.00 (ref)                                 | 18                                    | 1.35 (0.63, 2.88)       | 37                                    | 1.24 (0.64, 2.42)       | 0.81                 |
| Kidney disease (580-593)         | 1.00 (ref)                                 | 13                                    | 1.19 (0.49, 2.92)       | 33                                    | 1.07 (0.57, 2.00)       | 0.66                 |
| Diabetes (250)                   | 1.00 (ref)                                 | 11                                    | 0.98 (0.38, 2.51)       | 55                                    | 1.50 (0.82, 2.73)       | 0.26                 |

<sup>a</sup>Adjusted for age, smoking status, environmental tobacco smoke, occupation, education, shift work, BMI, hormone therapy, family income, parity, alcohol drinking, marital status, caloric intake, physical activity, stove ventilation.

<sup>b</sup>Women were excluded from analyses of specific causes of death if they reported a history of corresponding diseases at baseline.

**Table S2. Risk of all-cause and cause-specific mortality by ever usage of coal in Shanghai Women's Health Study, stratified by education**

| Cause of death (ICD 9)           | Never used coal<br>HR(95% CI) <sup>a</sup> | Middle school and above               |                         | Elementary school and below           |                         | Interaction <i>P</i> |
|----------------------------------|--------------------------------------------|---------------------------------------|-------------------------|---------------------------------------|-------------------------|----------------------|
|                                  |                                            | Ever used coal<br>Deaths <sup>b</sup> | HR(95% CI) <sup>a</sup> | Ever used coal<br>Deaths <sup>b</sup> | HR(95% CI) <sup>a</sup> |                      |
| All cause                        | 1.00 (ref)                                 | 1014                                  | 1.21 (1.09, 1.34)       | 1486                                  | 1.06 (0.96, 1.17)       | 0.10                 |
| Lung cancer (162)                | 1.00 (ref)                                 | 102                                   | 1.38 (1.00, 1.91)       | 113                                   | 1.03 (0.73, 1.46)       | 0.43                 |
| Cancer (140-208)                 | 1.00 (ref)                                 | 530                                   | 1.25 (1.08, 1.44)       | 515                                   | 1.03 (0.87, 1.21)       | 0.13                 |
| Cardiovascular (390-459)         | 1.00 (ref)                                 | 188                                   | 1.42 (1.11, 1.81)       | 395                                   | 1.09 (0.90, 1.32)       | 0.24                 |
| Ischemic heart disease (410-414) | 1.00 (ref)                                 | 36                                    | 1.86 (1.02, 3.40)       | 97                                    | 1.56 (1.02, 2.38)       | 0.76                 |
| Myocardial infarction (410)      | 1.00 (ref)                                 | 27                                    | 1.86 (0.93, 3.72)       | 64                                    | 1.88 (1.07, 3.32)       | 0.84                 |
| Stroke (430-438)                 | 1.00 (ref)                                 | 118                                   | 1.23 (0.90, 1.66)       | 231                                   | 0.92 (0.72, 1.17)       | 0.15                 |
| Ischemic stroke (434)            | 1.00 (ref)                                 | 45                                    | 1.31 (0.80, 2.15)       | 100                                   | 0.99 (0.69, 1.43)       | 0.29                 |
| Hemorrhagic stroke (430-432)     | 1.00 (ref)                                 | 65                                    | 1.17 (0.78, 1.74)       | 100                                   | 0.77 (0.54, 1.09)       | 0.15                 |
| Gastrointestinal (520-579)       | 1.00 (ref)                                 | 23                                    | 1.80 (0.85, 3.83)       | 32                                    | 1.00 (0.52, 1.93)       | 0.24                 |
| Kidney disease (580-593)         | 1.00 (ref)                                 | 18                                    | 1.32 (0.62, 2.82)       | 28                                    | 0.91 (0.46, 1.81)       | 0.50                 |
| Diabetes (250)                   | 1.00 (ref)                                 | 21                                    | 1.57 (0.66, 3.72)       | 45                                    | 1.34 (0.73, 2.47)       | 0.42                 |

<sup>a</sup>Adjusted for age, smoking status, environmental tobacco smoke, occupation, shift work, BMI, hormone therapy, family income, parity, alcohol drinking, marital status, caloric intake, physical activity, stove ventilation.

<sup>b</sup>Women were excluded from analyses of specific causes of death if they reported a history of corresponding diseases at baseline.

**Table S3. Risk of all-cause and cause-specific mortality by ever usage of coal in Shanghai Women's Health Study, stratified by kitchen ventilation**

| Coal Use<br>Cause of death (ICD 9) | Never used coal<br>HR(95% CI) <sup>a</sup> | Always good ventilation               |                         | Always fair/poor ventilation          |                         | Interaction <i>P</i> |
|------------------------------------|--------------------------------------------|---------------------------------------|-------------------------|---------------------------------------|-------------------------|----------------------|
|                                    |                                            | Ever used coal<br>Deaths <sup>b</sup> | HR(95% CI) <sup>a</sup> | Ever used coal<br>Deaths <sup>b</sup> | HR(95% CI) <sup>a</sup> |                      |
| All cause                          | 1.00 (ref)                                 | 355                                   | 1.03 (0.90, 1.19)       | 505                                   | 1.16 (1.01, 1.33)       | 0.92                 |
| Cancer (140-208)                   | 1.00 (ref)                                 | 169                                   | 1.20 (0.98, 1.47)       | 199                                   | 1.01 (0.82, 1.25)       | 0.75                 |
| Lung cancer (162)                  | 1.00 (ref)                                 | 34                                    | 1.08 (0.70, 1.67)       | 35                                    | 1.13 (0.67, 1.91)       | 0.16                 |
| Cardiovascular (390-459)           | 1.00 (ref)                                 | 81                                    | 1.00 (0.75, 1.33)       | 120                                   | 1.15 (0.86, 1.54)       | 0.71                 |
| Ischemic heart disease (410-414)   | 1.00 (ref)                                 | 23                                    | 1.79 (0.97, 3.30)       | 30                                    | 2.04 (1.01, 4.12)       | 0.29                 |
| Myocardial infarction (410)        | 1.00 (ref)                                 | 16                                    | 2.39 (1.09, 5.26)       | 21                                    | 2.71 (1.06, 6.89)       | 0.60                 |
| Stroke (430-438)                   | 1.00 (ref)                                 | 35                                    | 0.70 (0.46, 1.04)       | 68                                    | 0.90 (0.63, 1.30)       | 0.59                 |
| Ischemic stroke (434)              | 1.00 (ref)                                 | 11                                    | 0.47 (0.24, 0.93)       | 32                                    | 1.09 (0.63, 1.91)       | 0.53                 |
| Hemorrhagic stroke (430-432)       | 1.00 (ref)                                 | 21                                    | 0.89 (0.52, 1.53)       | 30                                    | 0.72 (0.43, 1.19)       | 0.53                 |
| Gastrointestinal (520-579)         | 1.00 (ref)                                 | 6                                     | 0.86 (0.31, 2.35)       | 9                                     | 1.71 (0.49, 6.00)       | 0.32                 |
| Kidney disease (580-593)           | 1.00 (ref)                                 | 8                                     | 0.84 (0.34, 2.07)       | 6                                     | 0.95 (0.25, 3.60)       | 0.99                 |
| Diabetes (250)                     | 1.00 (ref)                                 | 7                                     | 1.74 (0.56, 5.37)       | 16                                    | 2.17 (0.84, 5.62)       | 0.066                |

<sup>a</sup>Adjusted for age, smoking status, environmental tobacco smoke, occupation, education, shift work, BMI, hormone therapy, family income, parity, alcohol drinking, marital status, caloric intake, physical activity, stove ventilation.

<sup>b</sup>Women were excluded from analyses of specific causes of death if they reported a history of corresponding diseases at baseline.
